# Supplementary material
Source: publisher figshare collection journal article supplement (https://geolsoc.figshare.com/ndownloader/files/23204873)
Supplement: Supplementary file 1 [file 23204873]

## Sheet: Table S5 
Table S5. Trace-element concentrations of K-bentonites in the Songmutang section of the Upper Yangtze region (ppm)
Sample	H53-1	H53-4	H53-01	H53-02	H53-04	53-01	53-1	53-2	53-3	53-4	53-5	53-6
Li	13.2	12.9	22.4	17.2	8.9	15.5	9.88	23.3	19.4	11.7	21.4	15.4
Be	4.16	4.88	6.82	7.21	5.35	6.65	4.99	5.99	4.8	5.15	5.79	5.82
Sc	5.1	11.5	13.8	19.6	28	11.1	3.86	10.3	6.63	9.59	15	13.3
V	38.8	39.4	90.6	127	135.4	76.2	24.9	39.5	26.5	62.9	28.9	43.6
Cr	4.52	2.44	3.15	4.83	9.62	16.2	3.77	2.69	3.41	12.5	1.21	2.68
Co	23.63	11.83	6.08	12.94	2.35	10.4	8.58	7.19	12.48	5.92	6.94	5.59
Ni	16.1	3.5	39.6	65	13	16.1	27.8	62.6	52.1	7.4	66.5	7.56
Cu	10.6	3.5	45.4	58.9	72.1	31.2	5.3	11.5	31.2	8.55	14.9	8.88
Zn	47.1	22.1	174.8	188	37	42	39.2	80.6	49.5	33.5	85.2	60.9
Ga	25	30.1	36.1	34.3	29	30.5	23.4	31.6	26.8	29.6	27.4	32.9
Rb	246	291	280	266	264	275	262	260	231	288	261	292
Sr	304	87	27	23	11	160	403	370	347	227	218	65.6
Y	30.8	43	143.1	111.2	25.5	23	33.1	42.2	30.1	27	53.2	45.5
Zr	241	305	1449	1017	224	213	237	224	176	205	233	332
Nb	12.3	13.3	366.6	344.3	22.8	8.5	14.5	14.3	12.8	9.13	15.6	14.3
Mo	4.87	1.6	2.65	8.14	7.27	7.59	2.53	2.68	1.13	3.38	1.21	1.91
Sn	7.56	5.63	9.74	9.15	6.23	9.96	8.57	7.07	7.71	6.69	7.65	6.46
Cs	15.8	17	19.3	17	23.1	18.4	14	17.1	15.6	18.5	16.8	20.1
Ba	41913	23680	6246	6484	6459	24647	44957	37342	49551	32937	33418	28650
La	37.1	18.2	88.1	43.3	2.9	9.7	50.5	46	35.3	27.5	38.6	16.3
Ce	67.6	46.5	191.8	106.1	5.9	25.3	95.4	97.2	75.6	54.2	97.7	46.2
Pr	7.18	5.5	24.3	12.56	0.84	3.37	9.21	10.8	8.18	5.46	12.3	6.04
Nd	25	20.3	86.5	49.9	3.8	15.3	31.2	43.2	29.8	18.9	51.7	24.6
Sm	5.57	4.37	19.55	12.72	1.32	4.57	6.15	9.44	6.64	4.04	12.2	5.71
Eu	4.58	3.07	5.72	4.1	1	1.31	1.97	2.08	2.1	1.69	2.62	1.52
Gd	4.43	4.09	20.83	14.14	2.1	3.66	4.81	7.96	5.09	3.5	9.7	5.17
Tb	0.77	0.91	4.31	3.04	0.54	0.59	0.8	1.21	0.8	0.61	1.42	0.99
Dy	4.76	6.78	27.69	21	4.26	3.66	5.07	7.45	4.82	3.95	8.79	7.07
Ho	0.97	1.45	4.96	4.02	0.91	0.77	1.1	1.54	1.02	0.86	1.79	1.53
Er	3.29	4.5	12.89	11.23	2.9	2.41	3.68	4.63	3.22	2.84	5.45	4.68
Tm	0.52	0.68	1.65	1.51	0.46	0.39	0.57	0.69	0.5	0.45	0.85	0.71
Yb	3.88	4.52	9.69	9.51	3	2.66	4.17	4.77	3.62	3.17	5.84	4.38
Lu	0.59	0.63	1.23	1.26	0.43	0.38	0.63	0.7	0.56	0.47	0.86	0.64
Hf	7.89	9.75	47.65	44.05	11.9	6.73	7.91	7.56	6.34	7	8.12	10.1
Ta	2.9	2.23	27.29	21.32	2.33	1.69	3.21	2.23	2.65	1.96	2.5	2.22
Tl	2.87	1.91	1.76	1.74	2.77	3.35	3.26	3.64	3.58	3.4	2.74	2.21
Pb	8.29	6.63	20.12	16.04	7.45	13.7	6.02	10.1	5.91	19.6	5.45	6.3
Th	57.56	26.77	60.47	43.31	28.88	29	61.6	51.3	52.3	30.6	48	46.4
U	15.76	8.05	16.5	15.23	5.87	17.8	24.3	12.8	14.6	11.8	19.6	12.8
ΣREE	166	121	499	294	30	74	215	238	177	128	250	126
(La/Yb)N	6.85	2.89	6.52	3.27	0.68	2.62	8.69	6.91	6.99	6.22	4.74	2.67
δEu	2.82	2.22	0.87	0.93	1.84	0.98	1.11	0.73	1.1	1.37	0.74	0.86
Th/Yb	14.84	5.93	6.24	4.55	9.62	10.92	14.77	10.74	14.45	9.66	8.22	10.61
Nb/Yb	3.18	2.95	37.83	36.21	7.6	3.18	3.48	2.99	3.53	2.88	2.66	3.27
